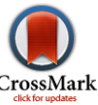

# Analysis of Prostate-Specific Antigen Transcripts in Chimpanzees, Cynomolgus Monkeys, Baboons, and African Green Monkeys

James N. Mubiru<sup>1\*</sup>, Alice S. Yang<sup>2</sup>, Christian Olsen<sup>3</sup>, Sudhir Nayak<sup>4</sup>, Carolina B. Livi<sup>5</sup>, Edward J. Dick Jr.<sup>1</sup>, Michael Owston<sup>1</sup>, Magdalena Garcia-Forey<sup>1</sup>, Robert E. Shade<sup>1</sup>, Jeffrey Rogers<sup>6</sup>

**1** Southwest National Primate Research Center, Texas Biomedical Research Institute, San Antonio, Texas, United States of America, **2** Department of Biology, St. Mary's University, San Antonio, Texas, United States of America, **3** Biomatters Inc., Newark, New Jersey, United States of America, **4** Department of Biology, The College of New Jersey, Ewing, New Jersey, United States of America, **5** Department of Molecular Medicine and Institute of Biotechnology, University of Texas Health Science Center, San Antonio, Texas, United States of America, **6** Human Genome Sequencing Center, Baylor College of Medicine, Houston, Texas, United States of America

## Abstract

The function of prostate-specific antigen (PSA) is to liquefy the semen coagulum so that the released sperm can fuse with the ovum. Fifteen spliced variants of the *PSA* gene have been reported in humans, but little is known about alternative splicing in nonhuman primates. Positive selection has been reported in sex- and reproductive-related genes from sea urchins to *Drosophila* to humans; however, there are few studies of adaptive evolution of the *PSA* gene. Here, using polymerase chain reaction (PCR) product cloning and sequencing, we study *PSA* transcript variant heterogeneity in the prostates of chimpanzees (*Pan troglodytes*), cynomolgus monkeys (*Macaca fascicularis*), baboons (*Papio hamadryas anubis*), and African green monkeys (*Chlorocebus aethiops*). Six *PSA* variants were identified in the chimpanzee prostate, but only two variants were found in cynomolgus monkeys, baboons, and African green monkeys. In the chimpanzee the full-length transcript is expressed at the same magnitude as the transcripts that retain intron 3. We have found previously unidentified splice variants of the *PSA* gene, some of which might be linked to disease conditions. Selection on the *PSA* gene was studied in 11 primate species by computational methods using the sequences reported here for African green monkey, cynomolgus monkey, baboon, and chimpanzee and other sequences available in public databases. A codon-based analysis (dN/dS) of the *PSA* gene identified potential adaptive evolution at five residue sites (Arg45, Lys70, Gln144, Pro189, and Thr203).

**Citation:** Mubiru JN, Yang AS, Olsen C, Nayak S, Livi CB, et al. (2014) Analysis of Prostate-Specific Antigen Transcripts in Chimpanzees, Cynomolgus Monkeys, Baboons, and African Green Monkeys. PLoS ONE 9(4): e94522. doi:10.1371/journal.pone.0094522

**Editor:** A. Aziz Aboobaker, University of Oxford, United Kingdom

**Received:** May 17, 2013; **Accepted:** March 18, 2014; **Published:** April 14, 2014

**Copyright:** © 2014 Mubiru et al. This is an open-access article distributed under the terms of the Creative Commons Attribution License, which permits unrestricted use, distribution, and reproduction in any medium, provided the original author and source are credited.

**Funding:** Dr. Mubiru was supported by the Office of the Director, National Institutes of Health under Award # 8K01OD010973-04. This investigation used resources that were supported by the Southwest National Primate Research Center grant P51 RR013986 from the National Center for Research Resources, National Institutes of Health and that are currently supported by the Office of Research Infrastructure Programs through P51 OD013986. Nonhuman primates were housed in facilities constructed with support from Research Facilities Improvement Programs Grants C06 RR015456 and C06 RR014578 from the National Center for Research Resources, National Institutes of Health. This work received computational support from Computational Systems Biology Core, funded by the National Institute on Minority Health and Health Disparities (G12MD007591) from the National Institutes of Health. The funders had no role in study design, data collection and analysis, decision to publish, or preparation of the manuscript.

**Competing Interests:** Christian Olsen, one of the authors is employed by a commercial company Biomatters, Inc. as a Field Application Scientist. This does not alter the authors' adherence to all the PLOS ONE policies on sharing data and materials.

\* E-mail: jmubiru@txbiomed.org

## Introduction

Prostate-specific antigen (PSA) is encoded by the kallikrein-3 (*KLK3*) gene, which belongs to the tissue kallikrein (*KLK*) gene family; the official name of the gene is *KLK3*, although it is commonly referred to as *PSA* [1,2]. The *PSA* gene is composed of five exons and four introns. Part of the first exon codes for a signal peptide that targets the protein for secretion [3,4]. In the PSA protein, residues His57, Asp102, and Ser195 have been reported to be important for proteolytic activity of PSA and other kallikreins, and they are commonly referred to as the catalytic triad [5,6]. PSA has an activation peptide of seven amino acids that is cleaved by KLK2 protein to generate enzymatically active PSA [7,8]. PSA is highly expressed by prostatic epithelial cells and is abundant in seminal plasma [9]. After ejaculation, semen forms a coagulum through the linkage of semenogelin proteins [10,11]. Then, the coagulum has to be liquefied so that the sperm can be

released and fuse with the ovum. In humans, great apes, and Old World monkeys this is done by PSA [3,11–14].

Alternative splicing is a common mechanism in nature to enhance protein diversity, and it occurs in more than 90% of human genes [15,16]. Alternative splicing of the *PSA* gene produces at least 15 transcripts of 0.7–6.1 kb [17].

Positive selection has been reported in sex- and reproductive-related genes from sea urchins to *Drosophila* to humans [12,18,19]. However, there is scant data regarding the *PSA* gene despite its importance in reproductive success. Marques et al. (2012) recently provided evidence of adaptive evolution of the *KLK3* gene toward an expanded enzyme spectrum that has an effect on the hydrolysis of semen coagulum [20]. In another study that analyzed the *PSA* gene, Clark and Swanson (2005) reported an overall dN/dS value of 0.38 for the *PSA* gene in human-chimpanzee pairwise comparisons, suggesting purifying selection [21].

The aims of this study are to investigate *PSA* transcript heterogeneity in four nonhuman primates commonly used in biomedical research and to study the mode of selection exerted on this gene in primates. Our previous data showed that cynomolgus monkeys have high serum PSA concentrations compared to baboons, which have low concentrations [22]. The chimpanzee was examined because of its close evolutionary relationship to humans.

## Materials and Methods

### Ethics Statement

We opportunistically sampled animals that presented for necropsy. Six cynomolgus monkeys (*Macaca fascicularis*) and baboons (*Papio hamadryas anubis*) and four chimpanzees (*Pan troglodytes*) were from the Southwest National Primate Research Center (SNPRC), located at the Texas Biomedical Research Institute in San Antonio, Texas. Three African green monkey (*Chlorocebus aethiops*) samples were from the Department of Pathology/Comparative Medicine, Wake Forest University of Health Sciences, Winston-Salem, North Carolina. The chimpanzees died of heart failure as a result of chronic cardiomyopathy. Three cynomolgus monkeys were removed from the colony and euthanized because of positive titers to simian retrovirus. One baboon with a sperm granuloma that tested positive for herpes was removed from the colony and euthanized. The other animals were part of research studies and were euthanized at the end of the studies.

Animals were chemically restrained with an injection of ketamine HCl and euthanized humanely under the supervision of a veterinarian using euthanasia solution (Fatal plus, Vortech Pharmaceuticals, Dearborn, MI). Confirmation of death was determined by monitoring for absence of pulse, respiration, and neural reflexes. The Institutional Animal Care and Use Committee of the Texas Biomedical Research Institute approved all procedures. Human prostate cDNAs were from cryopreserved human prostate tissues that were collected following radical prostatectomies under an Institutional Review Board approved protocol for the Department of Pathology at the University of Texas Health Science Center, San Antonio, and have been described previously [23].

### Transcript Cloning

We extracted total RNA from prostates using Trizol reagent (Life Technologies, Carlsbad, CA), reverse-transcribed them, and performed polymerase chain reaction (PCR) analysis, as described previously [22].

Primer sequences were based on the cynomolgus monkey and chimpanzee sequences (GenBank accession numbers AY647976, NM\_001009136) [12,24] and are shown in Tables 1 and 2. The forward primers were located in exon 1, and the reverse primers were located in exon 5 or in intron 3. We used primer sequences located in intron 3 because of reports indicating that some *PSA* variants contain sequences in the third intron [25]. To obtain the complete coding sequences, we cloned the PCR products into the pCR2.1-TOPO vector (Life Technologies, Carlsbad, CA) and sequenced them. Cloning using the two primer sets was done at least four times for each animal species. Each time 22 colonies were picked and cultured. Positive clones were characterized by restriction enzyme analysis according to their size on an agarose gel. One clone of each size was sequenced. We predicted the presence of a signal peptide to determine whether the transcripts could be secreted outside the cell using the Signal Peptide Prediction website (<http://www.cbs.dtu.dk/services/SignalP/>).

### Real-Time PCR

A closer look at the transcripts indicated that they could be broadly grouped into those that used the sequences in intron 3 and those that did not. We performed real-time PCR to explore whether expression of transcripts that do not use intronic sequences takes precedence over those that do. We carried out quantitative reverse transcription (RT) PCR using TaqMan technology (Life Technologies, Carlsbad, CA). We designed primers and probes for the quantitation of the chimpanzee full-length and short-version transcripts using the IDTDNA SciTools software (Integrated DNA Technologies Inc., Coralville, IA); the sequences are shown in Table 2. TaqMan 18s ribosomal RNA probe and primers served as the internal control. All samples and standards were analyzed in triplicate. We conducted real-time fluorescence-based PCR using the ABI Prism 7900 real-time PCR thermal cycler (Applied Biosystems, Foster City, CA) under vendor-specified conditions. We determined the values of the unknown samples from the standard curves prepared in each assay and normalized the concentration of the *PSA* transcripts to 18s ribosomal RNA.

### Analysis of Selection

We assessed the evolutionary selection acting on the *PSA* gene using 11 *PSA* gene sequences. Our group produced four sequences, one each for *Pan troglodytes*, *Macaca fascicularis*, *Papio hamadryas anubis*, and *Chlorocebus aethiops*; these sequences are reported in this paper. Eight other sequences—*Macaca fascicularis* (AY647976), *Macaca mulatta* (NM\_001042776.1), *Macaca fuscata* (KC155626.1), *Homo sapiens* (NM\_001648.2), *Pan paniscus* (DQ150478.1), *Gorilla gorilla* (KC155627.1), *Pongo pygmaeus* (DQ150480.1), and *Nomascus leucogenys* (UCSC genome Browser, Gibbon chr10)—were retrieved from public databases.

Protein sequences were aligned using the Multiple Sequence Comparison by Log-Expectation (MUSCLE) program, and codon-guided alignments were generated using Java Codon Delimited Alignment (JCoDA) [26,27]. Preliminary analysis of dN/dS (nonsynonymous changes/synonymous changes) was performed on all pairwise comparisons using the coding region and sliding window (window 20, jump 5) analysis in JCoDA. Although purifying selection dominated across all comparisons, multiple regions in the C-terminal region appeared to be under relaxed or positive selection or with dN/dS ( $\omega$ ) values greater than 2. To identify individual residues under positive selection, we used the Phylogenetic Analysis by Maximum Likelihood (PAML) software package, version 4.7, with the following comparisons: between null hypothesis M0 (one ratio for all branches) and hypothesis M3 (discrete), between hypotheses M1 (neutral) and M2 (selection), and between hypotheses M7 ( $\beta$ -distributed 0 to 1) and M8 ( $\beta$ -distributed and estimated  $\omega$ ). Sites under selection were identified using the Bayes empirical Bayes (BEB) approach, the naive empirical Bayes (NEB) approach, and the likelihood ratio test (LRT) in CODEML (part of the PAML package) [28–31].

Phylogenetic trees were constructed using neighbor-joining, maximum parsimony, maximum-likelihood, and unweighted pair group method with arithmetic mean (UPGMA) methods provided with the Phylip package, version 3.695 [32]. In each case, tree topology was tested using bootstrapping with 100 replicates.

We were cognizant of the reported chimeric nature of the *KLK2/KLK3* genes in both *Gorilla gorilla* and *Nomascus leucogenys*. Marques et al. (2012) indicated that the gorilla and gibbon *KLK3* gene is in fact a fusion of *KLK3* and *KLK2* (*cKLK*), in which the first four exons of the fused gene are orthologous to *KLK3* and the last exon is more similar to *KLK2* [20]; therefore in our analysis we excluded exon 5. However, it has also been reported that at the

**Table 1.** Primer sequences used for cloning cynomolgus monkey, baboon, African green monkey, and chimpanzee *PSA*.

| Primer                                                                                  | Sequence 5'–3'              | Location of Primer | Product Size |
|-----------------------------------------------------------------------------------------|-----------------------------|--------------------|--------------|
| Cynomolgus monkey, baboon, and African green monkey full-length <i>PSA</i> cDNA cloning |                             |                    |              |
| PSA outer forward (A-07-2911)                                                           | 5'-CTGGACAGCTGTGTCACCAT-3'  | Exon 1             | 1081 bases   |
| PSA outer reverse (A-07-3585)                                                           | 5'-TGAGATGTCTCCAGGCATGA-3'  | Exon 5             |              |
| PSA inner forward (A-07-2910)                                                           | 5'-CTGTGTCACCATGTGGGTTCC-3' | Exon 1             | 811 bases    |
| PSA inner reverse (A-07-2908)                                                           | 5'-GAGTTGATGGGGTGCTCAG-3'   | Exon 5             |              |
| Chimpanzee full-length <i>PSA</i> cDNA cloning                                          |                             |                    |              |
| Chimp outer forward (12-3746)                                                           | 5'-CTGTGTCACCATGTGGGTTCC-3' | Exon 1             | 847 bases    |
| Chimp outer reverse (12-3747)                                                           | 5'-GGTCATTTCCTCAAGTTCCAA-3' | Exon 5             |              |
| Chimp inner forward (A-11-1635)                                                         | 5'-ACCATGTGGGTCCTGGTTGT-3'  | Exon 1             | 808 bases    |
| Chimp inner reverse (12-3748)                                                           | 5'-AGGGAGTTGATAGGGGTGCT-3'  | Exon 5             |              |
| <i>PSA</i> cDNA cloning of transcripts that use intron 3 (all four species)             |                             |                    |              |
| Chimp outer forward (A-07-2910)                                                         | 5'-CTGTGTCACCATGTGGGTTCC-3' | Exon 1             | 568 bases    |
| Chimp outer reverse (A-11-1472)                                                         | 5'-CTGTCCCCTCCTCCCTCAG-3'   | Intron 3           |              |
| Chimp inner forward (A-11-1635)                                                         | 5'-ACCATGTGGGTCCTGGTTGT-3'  | Intron 1           | 568 bases    |
| Chimp inner reverse (A-11-1636)                                                         | 5'-CCTCAGACCCAGGCATCT-3'    | Intron 3           |              |

doi:10.1371/journal.pone.0094522.t001

protein level these genomic rearrangements in exon 5 account for only minor amino acid replacements and are not predicted to alter protein structure and function and that *cKLK* is likely a functional *KLK3*-like gene [20].

When numbering the amino acid residues, we followed both the *PSA* protein numbering and also the convention used for serine proteases. The convention numbering system is based on chymotrypsin and denotes that the catalytic triad is composed of His57, Asp102, and Ser195 and that the “Kallikrein loop” is composed of an 11 amino acid insertion (95A–95K) that is specific for *PSA* [33].

## Results

### Transcript Cloning

We identified two *PSA* transcripts in the cynomolgus monkey, baboon, and African green monkey and six *PSA* transcripts in the chimpanzee prostate (Table 3; Figure 1). From all four species the same two main transcripts were identified: *PSA-1* has the five exons characteristic of the kallikrein (*KLK*) gene family, and *PSA-2* is missing exons 4 and 5 and uses sequences in intron 3. Because of intron retention, a unique 50-base sequence is added to exon 3. The *PSA-1* transcript is derived from five exons with an open reading frame of 786 bases encoding a 261 amino acid protein and

has a predicted molecular weight of 28,839 Da (Figure 2). This sequence is orthologous to the human *KLK3* transcript variant 1 (NM\_001648.2). The cynomolgus monkey *PSA-1* is identical to the one reported by Marshal et al. (2006) under GenBank accession number AY647976.1 [24]. The baboon sequence is identical to sequences under GenBank accession numbers NM\_001112745, DQ150485 [21], and EF676031 [22]. The chimpanzee sequence is identical to a sequence under GenBank accession number DQ150477 [21]. The African green monkey *PSA-1* is novel, because no similar transcript was found in the National Center for Biotechnology Information (NCBI) GenBank.

The *PSA-2* transcript has an open reading frame of 543 bases, which encodes a 180 amino acid protein, and has a molecular weight of 19,820 Da (Figure 2). The chimpanzee transcript is identical to a chimpanzee sequence available in the GenBank under accession number NM\_001009136.1 [12] and is orthologous to gorilla and orangutan sequences numbers AY781395.1 and AY78139.1, respectively. It is 98% similar to a human sequence identified as *PSA-RP2* reported by Heuzé-Vourc'h et al. (2001) (GenBank AJ310937, number CAC41631) [25]. The cynomolgus monkey, baboon, and African green monkey *PSA-2* sequences are novel; no similar transcripts were found in the NCBI GenBank.

**Table 2.** Primer sequences used for real-time quantification of chimpanzee full-length and short-version *PSA* transcripts.

| Primer                     | Sequence 5'–3'                | Location of Primer       |
|----------------------------|-------------------------------|--------------------------|
| Chimp full-length forward  | 5'-GCAAGTTCACCTCAGAAG-3'      | Exon 4                   |
| Chimp full-length reverse  | 5'-GAAGCACACCATTACAGACAAG-3'  | Exon 5                   |
| Chimp full-length probe    | 5'-CCCCCAGAATCACCCGAGCAGG-3'  | Exon 4–exon 5 junction   |
| Chimp short-length forward | 5'-GGATGCTGTGAAGGTCATGG-3'    | Exon 3                   |
| Chimp short-length reverse | 5'-CATACACTCCTCTGGTTTCGATG-3' | Exon 3–intron 3 junction |
| Chimp short-length probe   | 5'-AGTGCTGGCTCCTGGGTGG-3'     | Exon 3                   |

doi:10.1371/journal.pone.0094522.t002

**Table 3.** Summary of PSA gene splice events in chimpanzee (*Pan troglodytes*), cynomolgus monkeys (*Macaca fascicularis*), baboons (*Papio hamadryas anubis*), and African green monkeys (*Chlorocebus aethiops*).

|                                      | PSA Variant                | Splicing Event                                           |
|--------------------------------------|----------------------------|----------------------------------------------------------|
| Chimpanzee (6 transcripts)           | Chimpanzee PSA-1           | Complete 5 exons                                         |
|                                      | Chimpanzee PSA-2           | Uses sequences in intron 3                               |
|                                      | Chimpanzee PSA-3           | Skips 89 bases in exon 3                                 |
|                                      | Chimpanzee PSA-4           | Skips 129 bases in exon 3                                |
|                                      | Chimpanzee PSA-5           | Skips 36 bases in exon 4                                 |
|                                      | Chimpanzee PSA-6           | Skips 129 bases in exon 3 and uses sequences in intron 3 |
| Cynomolgus monkey (2 transcripts)    | Cynomolgus PSA-1           | Complete 5 exons                                         |
|                                      | Cynomolgus PSA-2           | Uses sequences in intron 3                               |
| Baboon (2 transcripts)               | Baboon PSA-1               | Complete 5 exons                                         |
|                                      | Baboon PSA-2               | Uses sequences in intron 3                               |
| African green monkey (2 transcripts) | African green monkey PSA-1 | Complete 5 exons                                         |
|                                      | African green monkey PSA-2 | Uses sequences in intron 3                               |

doi:10.1371/journal.pone.0094522.t003

Four more transcripts were identified in the chimpanzee. Chimpanzee PSA-3 has an open reading frame of 456 bases. It skips 89 bases of exon 3, resulting in an early stop codon. It codes for a 151 amino acid protein and has a predicted molecular weight of 16,470 Da. It is novel, as no similar transcript was found in the NCBI GenBank.

Chimpanzee PSA-4 is a result of an in-frame deletion of 129 bases of exon 3. This transcript has an open reading frame of 657 bases, which encodes a 218 amino acid protein, and has a molecular weight of 23,768 Da. This transcript is orthologous to the human *KLK3* transcript variant 4 (NCBI accession number NM\_001030048) and a rhesus monkey sequence (UniProt number F6TBJ4\_MACMU).

Chimpanzee PSA-5 is novel, consisting of four exons. It skips 38 bases in the 5' part of exon 4, resulting in an early stop codon, and is therefore shorter than chimpanzee PSA-1. It has an open reading frame of 507 bases and encodes a 168 amino acid protein and has a predicted molecular weight of 18,774 Da.

Chimpanzee PSA-6 is also novel. It is similar to the chimpanzee PSA-2 transcript, except that it skips 129 bases in the 5' part of exon 3 as a result of use of an alternative splice acceptor site. It has an open reading frame of 414 bases, which encodes a 137 amino acid protein, and has a molecular weight of 14,730 Da.

We cannot rule out the possibility that other splice variants were not found by our cloning strategy, especially those expressed at much lower levels.

All the novel transcripts reported in this study for nonhuman primates were also found in human prostate cDNA, indicating greater similarity among the prostate transcriptomes across primates than has previously been appreciated. In addition, all the PSA transcripts reported have an intact signal peptide consisting of 17 amino acids. However, only the PSA-1 transcripts have an intact catalytic triad.

A comparison of the amino acid sequences of the PSA-1 and PSA-2 transcripts is shown in Figure 2. The transcripts reported in this study have been deposited in the NCBI GenBank under accession numbers KC853005 (*Chlorocebus aethiops* PSA-1),

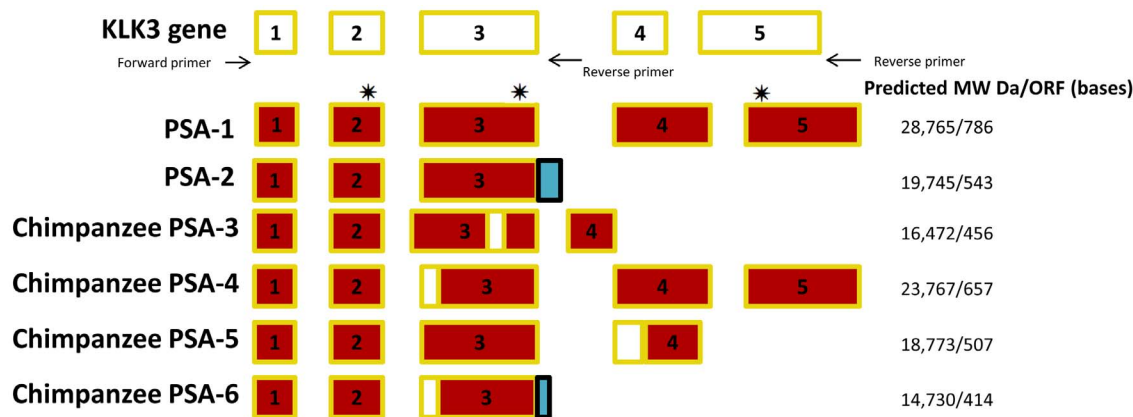

**Figure 1. Structure of the PSA variants identified in cynomolgus monkey, baboon, African green monkey, and chimpanzee prostates.** The retained intronic sequences are shown in blue, and the missing parts of exons are shown by blank boxes. The molecular weight (MW) and open reading frame (ORF) length of each predicted translation product were determined using the computational tool located at the EXPASY website (<http://expasy.org/>) and are shown to the right of the corresponding transcript. The residues that make up the catalytic triad are shown by asterisks.

doi:10.1371/journal.pone.0094522.g001

**A**

```

Cynomolgus      MWVLVVFLTLSVTWIGAAPLILSRI VGGWECEKHSQPWQVLVASRGRAVCGGVLVHPQWV
Baboon          MWVLVVFLTLSVTWIGAAPLILSRI VGGWECEKHSQPWQVLVASRGRAICGGVLVHPQWV
African green   MWVLVVFLTFSVTWIGAAPLILSRI VGGWECEKHSQPWQVLVASRGRAVCGGVLVHPQWV
Chimpanzee      MWVLVVFLTLSVTWIGAVPLILSRI VGGWECKKHSQPWQVLVASRGRAVCGGVLVHPQWV
*****:*****:*****:*****:*****:*****:*****:*****:*****:*****:*****:*****

      ↓                                     ↓

Cynomolgus      LTAAHCIRSHSVILLGRHNPFYPEDTGQVFQVSHSFPHPLYNMSLLKNRYLGPDDSSHD
Baboon          LTAAHCIRSNSVILLGRHNPFYPEDTGQVFQVSHSFPHPLYNMSLLKNRYLGPDDSSHD
African green   LTAAHCIRSNSVILLGRHNLFPEDTGQVFQVSHSFPHPLYNMSLLKNRYLGPDDSSHD
Chimpanzee      LTAAHCIRNKSVILLGRHSLFHPEDTGQVFQVSHSFPHPLYDMSLLKNRFLRPGDDSSHD
*****:*****:*****:*****:*****:*****:*****:*****:*****:*****:*****

Cynomolgus      LMLLRLSKPAEITDAVQVLDLPTWEPELGTTCYASGWGSIEPEEHLTPKKLQCVLDLHIIS
Baboon          LMLLRLSEPAEITDAVQVLDLPTWEALGTTCYASGWGSIEPEEHLTPKKLQCVLDLHIIS
African green   LMLLRLPEPAEITDAVQVVDLPTWEALGTTCYASGWGSIEPEEHLTARKLQCVLDLHIIS
Chimpanzee      LMLLRLSEPAEITDAVKVMDLSTQEPALGTTCYASGWGSIEPEEFLTPKKLQCVLDLQVIS
*****:*****:*****:*****:*****:*****:*****:*****:*****:*****:*****

      ↓

Cynomolgus      NDVCAQVHSQKVFEMLCAGSWMGKSTCSGDSGGPLVCDGVLQGITSWGSPCALPRRP
Baboon          NDVCAQVHFQKVKFMLCAGSWMGKSTCSGDSGGPLVCDGVLQGITSWGSPCALPRRP
African green   NDVCAQVHYQKVKFMLCAGSWRGKSTCSGDSGGPLICDGVLQGITSWGSPCALPQKP
Chimpanzee      NDVCAQVHPQKVKFMLCAGRWTGGKSTCSGDSGGPLVCDGVLQGITSWGSEPCALPERP
*****:*****:*****:*****:*****:*****:*****:*****:*****:*****:*****

Cynomolgus      SLYTKVVRYRKWIQDTIMANP
Baboon          SLYTKVVRYRKWIQDTIMANP
African green   ALYTKVVRYRKWIQDTIMANP
Chimpanzee      SLYTKVVHYRKWIKDTIVANP
*****:*****:*****:*****:*****:*****:*****:*****:*****:*****:*****
    
```

**B**

```

Cynomolgus      MWVLVVFLTLSVTWIGAAPLILSRI VGGWECEKHSQPWQVLVASRGRAVCGGVLVHPQWV
Baboon          MWVLVVFLTLSVTWIGAAPLILSRI VGGWECEKHSQPWQVLVASRGRAICGGVLVHPQWV
African green   MWVLVVFLTFSVTWIGAAPLILSRI VGGWECEKHSQPWQVLVASRGRAVCGGVLVHPQWV
Chimpanzee      MWVLVVFLTLSVTWIGAVPLILSRI VGGWECKKHSQPWQVLVASRGRAVCGGVLVHPQWV
*****:*****:*****:*****:*****:*****:*****:*****:*****:*****:*****

      ↓                                     ↓

Cynomolgus      LTAAHCIRSHSVILLGRHNPFYPEDTGQVFQVSHSFPHPLYNMSLLKNRYLGPDDSSHD
Baboon          LTAAHCIRSNSVILLGRHNPFYPEDTGQVFQVSHSFPHPLYNMSLLKNRYLGPDDSSHD
African green   LTAAHCIGNSVILLGRHNLFPEDTGQVFQVSHSFPHPLYNMSLLKNRYLGPDDSSHD
Chimpanzee      LTAAHCIRNKSVILLGRHSLFHPEDTGQVFQVSHSFPHPLYDMSLLKNRFLRPGDDSSHD
*****:*****:*****:*****:*****:*****:*****:*****:*****:*****:*****

Cynomolgus      LMLLRLSEPAEITDAVQVLDLPTWEPELGTTCYASGWGSIEPEERMPGPDGAAGSPDAWV
Baboon          LMLLRLSEPAEITDAVQVLDLPTWEALGTTCYASGWGSIEPEERMPGPDGAAGSPDAWV
African green   LMLLRLSEPAEITDAVQVVDLPTWEALGTTCYASGWGSIEPEERMPGPDGAAGSPDTWV
Chimpanzee      LMLLRLSEPAEITDAVKVMDLPTQEPALGTTCYASGWGSIEPEECMPGPDGAAGSPDAWV
*****:*****:*****:*****:*****:*****:*****:*****:*****:*****:*****
    
```

**Figure 2. Alignment of the predicted amino acid sequences of the PSA-1 transcripts (panel A) and PSA-2 transcripts (panel B).** The signal peptide is indicated in red italics. The residues that make up the catalytic triad are in blue and are indicated by arrows. The activation sequence is in bold and underlined. The unique 16-residue sequence that emanates from use of intron 3 is shown in green bold italic. The alignments were carried out using the CLUTALW program available at <http://www.ebi.ac.uk/toolsmsa/clustalw2/> (Thompson et al., 1994 [41]). doi:10.1371/journal.pone.0094522.g002

KC853006 (*Chlorocebus aethiops* PSA-2), KC853007 (*Macaca fascicularis* PSA-2), KC853008 (*Papio anubis* PSA-2), KC853009 (*Pan troglodytes* PSA-3), KC853010 (*Pan troglodytes* PSA-4), KC853011 (*Pan troglodytes* PSA-5), and JX445923 (*Pan troglodytes* PSA-6).

**Real-Time PCR**

We next investigated quantitative differences in expression levels among the six chimpanzee transcripts. Using real-time PCR techniques, we did not find a significant difference in amplification rates between the transcripts that use sequences in intron 3

(chimpanzee PSA-2 and PSA-6) from those that do not (chimpanzee PSA-1, -3, -4, -5) (Figure 3).

**Phylogenetic Analysis**

We compared the PSA gene sequences among 11 primate species to analyze selection on the PSA gene. The pairwise dN/dS values across all codon sites of the PSA gene of any two species did not exceed the threshold of 1, indicating purifying selection (Table S1). Although purifying selection dominated across all comparisons, multiple regions in the C-terminal region appeared to be

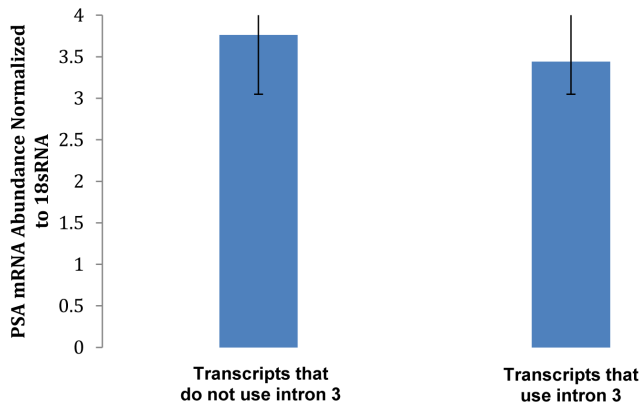

**Figure 3. Relative real-time PCR quantitation of chimpanzee transcripts that use intron 3 sequences compared to those that do not (mean  $\pm$  standard deviation,  $n=3$ ).** Individual tissue samples were reverse-transcribed and *PSA* transcript mRNA was quantitated using the primer/probe sets described in Table 2. Relative levels of the *PSA* variants were normalized to the 18s RNA levels in the same samples.

doi:10.1371/journal.pone.0094522.g003

under relaxed or positive selection with  $dN/dS$  ( $\omega$ ) values greater than 2. To identify individual residues under positive selection, we used the PAML software package, version 4.7, with the following comparisons: M0 vs. M3, M1 vs. M2, and M7 vs. M8 using the BEB and NEB approaches and the likelihood ratio test. All model comparisons with CODEML identified multiple residues with  $p > 0.5$  (probability of selection greater than 0.5), indicating directional selection. The M7 vs. M8 comparisons using the NEB and BEB approaches were similar, identifying five codons with  $dN/dS$  values greater than 2 (Table 4; Figure 4). When the codon-specific  $dN/dS$  value data were compared with the alternative splicing data, we found that several splice variants originated at codons with  $dN/dS$  values greater than 2 (Table 4).

All methods generated similar consensus trees with similar bootstrap support for internal nodes. The only exception was the branching of *Gorilla gorilla* and *Nomascus leucogenys*, which varied between methods. The maximum-likelihood phylogenetic tree is shown in Figure 5, and the branching order is similar to the topology reported by others, except for the placement of *Gorilla gorilla* [20]. We looked at branch-specific variation in selective pressure along phylogenetic lineages. This did not reveal any statistically significant differences, but we noted that the variations in  $dN/dS$  values ranged from 0 to 0.76 (Figure 5).

## Discussion

We found six alternatively spliced *PSA* variants in the chimpanzee but only two in the cynomolgus monkey, baboon, and African green monkey. To the best of our knowledge, this study is the first to report the African green monkey *PSA* mRNA sequence and also the first to report on alternative splicing of the *PSA* gene in nonhuman primates. It is important to note that the identification of alternative splice variants depends on the primers used, and therefore we cannot rule out the possibility that there are other splice variants not found by our cloning primers.

Alternative splicing of the *PSA* gene in this study involved exon truncation, intron retention, or a combination of two splicing events. In a study of human kallikrein genes, Kurlender et al. (2005) found exon skipping to be the most common splicing event, with internal exon deletion being less common in kallikrein genes [34]. However, in our study we found retention of sequences in intron 3 to be the most common splicing event; it was found in all the species studied. Real-time PCR data indicated that in chimpanzees the expression of transcripts that do not use sequences in intron 3 did not take precedence over those that do, although we cannot rule out the possibility that under certain physiological conditions there might be differences in transcript expression. It is not clear why alternative splicing of the *PSA* gene is more common in chimpanzees than in cynomolgus monkeys, baboons, and African green monkeys, but chimpanzees do share a more recent common ancestor with humans than any other nonhuman primates do. All the transcripts reported here have orthologous human counterparts. The *PSA-2* sequences are orthologous to the human *PSA-RP2* sequence, which has been shown to be up-regulated in prostate cancer [35], indicating potential links of these transcripts to prostatic diseases. The link between these transcripts and human disease conditions needs further study. It is important to note that the splice variants were found in areas of the gene that are likely to be under selective pressure.

Not surprisingly, given the role of PSA, purifying selection dominates in all pairwise comparisons. Further analysis using codon-based models in CODEML identified multiple residues in the *PSA* gene having  $dN/dS$  values greater than 1, indicating directional selection. These data suggest that selective pressure in the *PSA* gene is not uniform across all codon sites but rather is focused on specific regions. Five codons were found to have  $dN/dS$  values greater than 2, although only one His45 reached the 95% confidence level. It is important to note that another study also found codons 45, 189, and 203 to be positively selected [20]. In addition, we note that limiting our analysis to exons 1–4 curtailed our statistical power. When the same analyses were

**Table 4. Bayes empirical Bayes likelihood ratio test of *PSA* gene codons that are under positive selection using model M7 vs. model M8.**

| Position and Residue Change (KLK3 Numbering) | Position and Residue Change (Chymotrypsin Numbering) | $dN/dS$ | Probability of $dN/dS > 1$ | Splice Variant Generated at Site                  |
|----------------------------------------------|------------------------------------------------------|---------|----------------------------|---------------------------------------------------|
| H45R                                         | H37R                                                 | 4.40*   | 0.98                       |                                                   |
| N69K/S                                       | N61K/S                                               | 2.64    | 0.6                        | Chimpanzee <i>PSA-6</i> , Chimpanzee <i>PSA-4</i> |
| Q144W                                        | Q128W                                                | 2.60    | 0.60                       |                                                   |
| P189S                                        | P173S                                                | 4.30    | 0.94                       |                                                   |
| T203M/R                                      | T187M/R                                              | 3.51    | 0.77                       |                                                   |

\*  $p < 0.05$ .

doi:10.1371/journal.pone.0094522.t004

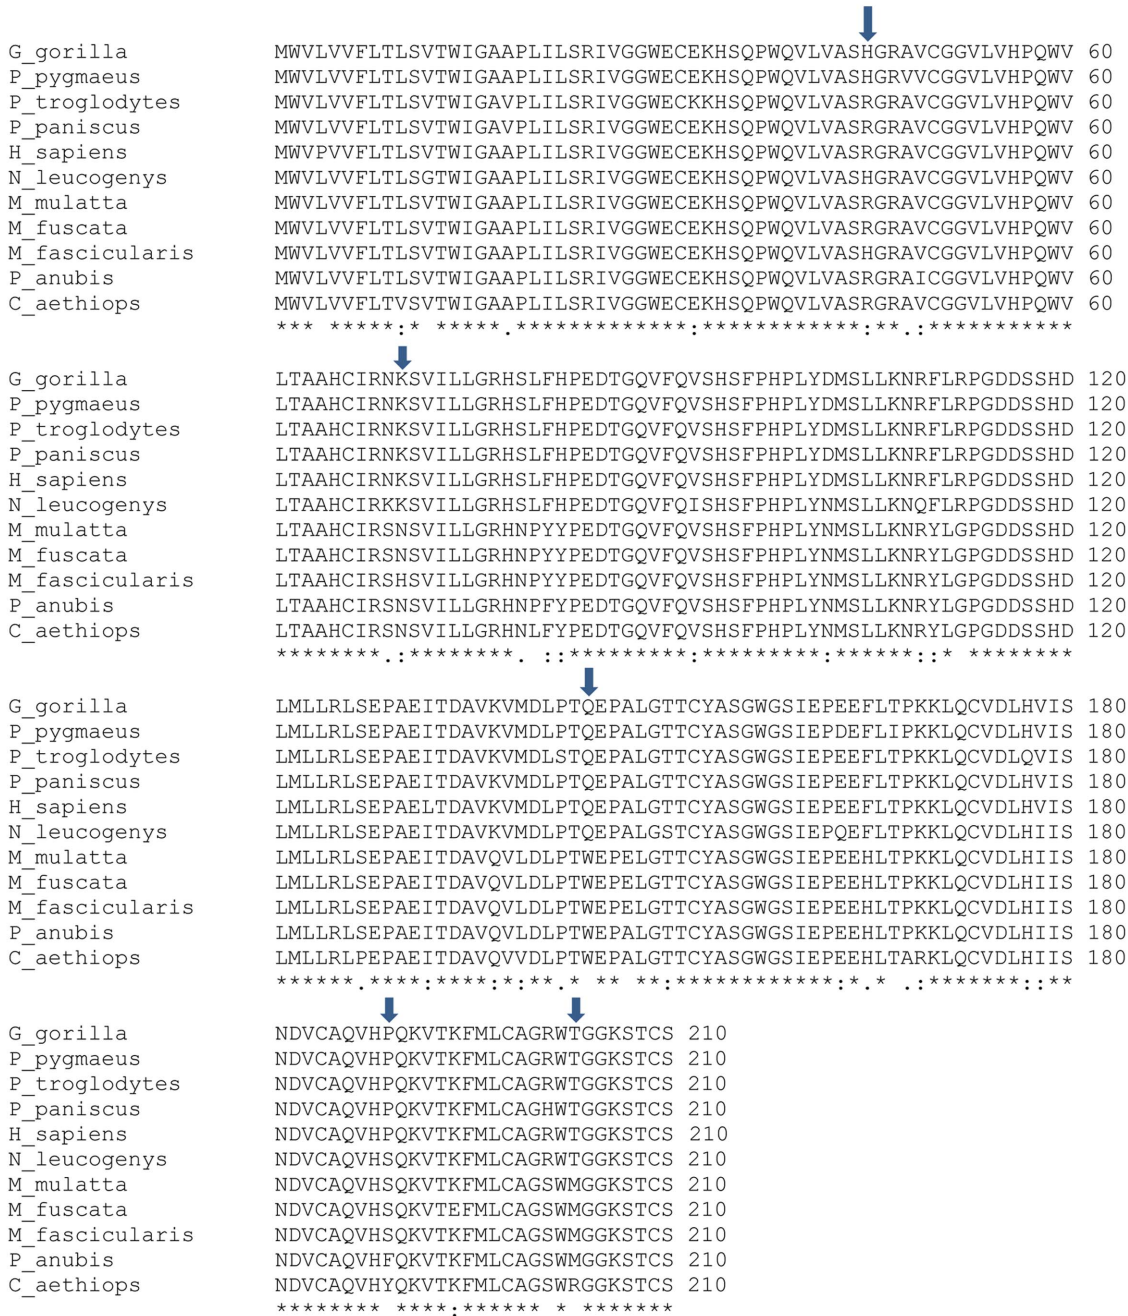

**Figure 4. Multiple sequence comparison by log expectation (MUSCLE) program guided alignments of PSA-1 transcripts from 11 species.** The codons that are under positive selection are indicated by arrows. Fully conserved residues are indicated by asterisks, partly conserved residues by colons, and weakly conserved residues by periods. The species' complete scientific names are as follows: *Pan troglodytes*, *Pan paniscus*, *Homo sapiens*, *Pongo pygmaeus*, *Gorilla gorilla*, *Nomascus leucogenys*, *Macaca fascicularis*, *Macaca fuscata*, *Macaca mulatta*, *Papio hamadryas anubis*, and *Chlorocebus aethiops*. doi:10.1371/journal.pone.0094522.g004

performed using full-length sequences with all five exons, we found additional codons that had dN/dS values greater than 1. Limiting our analyses to the first four exons was due to the reported fusion of *KLK3* and *KLK2* in *Gorilla gorilla* and *Nomascus leucogenys*, in which the first four exons of the fused gene are orthologous to *KLK3* and the last exon is more similar to *KLK2* [20].

At codon position 189 the amino acid proline is substituted for serine or phenylalanine. Substitution of proline residues in proteins is of significant interest because of proline's unique

structural and functional properties. Proline has a rigid conformation with low flexibility; it can often be found in tight turns in protein structures and also introduces kinks into alpha helices because it is unable to adopt a normal helical conformation. It is likely that proline substitution at codon 189 results in secondary and tertiary structural alteration, leading to significant functional changes. Although we did not explore functional consequences of the change at codon position 189 in this study, this is an excellent question for future analysis.

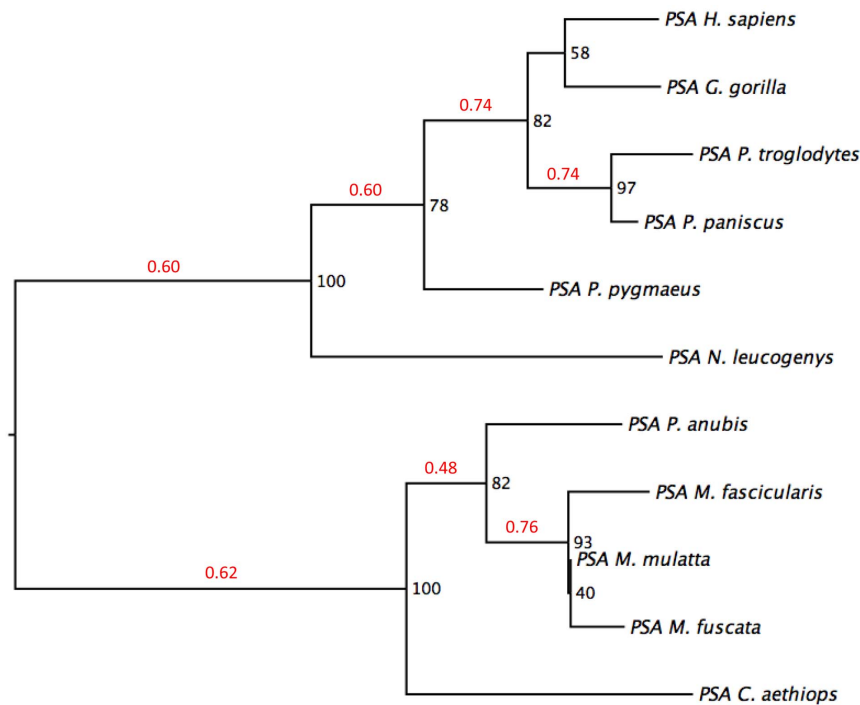

**Figure 5. Phylogenetic tree constructed using neighbor-joining, maximum parsimony, maximum-likelihood, and unweighted pair group method with arithmetic mean (UPGMA) methods provided in the Phylip package, version 3.695.** The numbers at each node are bootstraps, and the numbers in red on top of each branch are dN/dS values for that branch.  
doi:10.1371/journal.pone.0094522.g005

Our results of codon-based selection indicate that dN/dS values for the *PSA* gene are low relative to other proteins from the seminal fluid and prostasome. Clark and Swanson (2005) reported a dN/dS value of 2.9 for  $\beta$ -microseminoprotein and a value of 14 for prostate-specific transglutaminase for the class of codons identified to be under positive selection [21]. It is possible that the critical role for the PSA protein in copulatory plug dissolution constrains the changes tolerated and maintains low dN/dS values. Alternatively, the atypical evolutionary history of the *PSA* gene (e.g., fusion of *KLK3* and *KLK2* in some lineages) may be playing a contributing role that has yet to be defined.

Previous studies have indicated that chimpanzees have low serum PSA concentrations [36]. In our unpublished data we also found that chimpanzee PSA concentrations range from 0.01 to 0.031 ng/ml, well below levels reported in humans and other nonhuman primate species [22]. We propose that *PSA* gene evolution in the chimpanzee lineage might have functional implications. Clark and Swanson (2005) also showed that although the *PSA* gene does not have high pairwise human-chimpanzee dN/dS values, it does show significant variation in selective pressure during its evolution and dN/dS values along some phylogenetic lineages exceeded 1 [21].

The placement of the gorilla in our phylogenetic tree may be due to incomplete lineage sorting, whereby the genealogy relating humans, gorillas, and chimpanzees varies across the genome and about 22% of all coding exons exhibit phylogenies that contradict the overall genomic phylogeny, in which humans are more similar to chimpanzees than to gorillas [37]. The genomic region containing *PSA* may be one of the regions that has a local phylogeny in which the gorilla sequences are indeed more similar to the human sequences than the chimpanzee sequences are to either human or gorilla.

Because the function of PSA is to liquefy the sperm coagulum formed after ejaculation, we speculate that the differences in alternative splicing reported in this study might be related to the mating systems of these species. The four species studied here (chimpanzees, cynomolgus monkeys, baboons, and African green monkeys) all exhibit multimale-multifemale mating systems in which any given adult female may mate with more than one male during a single estrous cycle. However, some data suggest that chimpanzee females may have larger average numbers of mates per cycle. A single chimpanzee female frequently mates with numerous males during a single estrous cycle [38,39]. Multiple males may follow, compete for, and copulate with a female during a single cycle [39]. Such male-male competition also occurs in other species to some degree. But there is reason to believe that sperm competition is important in chimpanzees, as a rubbery and long-lasting “copulatory plug” that obstructs the sperm of subsequent mating events from accessing the ovum is produced by chimpanzee ejaculates and not by those of cynomolgus monkeys, African green monkeys, and baboons [40]. Further studies of transcript heterogeneity comparing several species that have different mating patterns would further elucidate the possible relationship between the alternative expression of the *PSA* gene and mating systems.

## Supporting Information

### Table S1 Species pairwise comparison of the dN/dS values of the *PSA* gene.

(DOC)

## Acknowledgments

We would like to thank Dr. Matthew J. Jorgensen of the Department of Pathology/Comparative Medicine, Wake Forest University Health Sci-



ences, Winston-Salem, North Carolina, for providing the African green monkey prostates. We gratefully acknowledge the technical assistance of Cathy Snider, Rita Sholund, Maureen Robbins, René Escalona, Michaelle Hohmann, Jesse Martinez, and Jacob Martinez. We would like to thank Dr. Anthony J. Valente, of the Department of Medicine, University of Texas Health Science Center, San Antonio; Dr. Dean Troyer, of Eastern Virginia Medical School, Departments of Pathology and Microbiology and Molecular Biology; and Jeff T. Williams of the Department of Genetics, Texas Biomedical Research Institute, for their helpful comments.

## References

1. Yousef GM, Chang A, Scorilas A, Diamandis EP (2000) Genomic organization of the human kallikrein gene family on chromosome 19q13.3–q13.4. *Biochem Biophys Res Commun* 276: 125–133.
2. Diamandis EP, Yousef GM, Luo I, Magklara I, Obiezu CV (2000) The new human kallikrein gene family: Implications in carcinogenesis. *Tr Endocrinol Metab* 11: 54–60.
3. Lundwall A, Lilja H (1987) Molecular cloning of human prostate specific antigen cDNA. *FEBS Lett* 214: 317–322.
4. Riegman PH, Vlietstra RJ, van der Korput JA, Romijn JC, Trapman J (1989) Characterization of the prostate-specific antigen gene: A novel human kallikrein-like gene. *Biochem Biophys Res Commun* 159: 95–102.
5. Carter P, Wells JA (1988) Dissecting the catalytic triad of a serine protease. *Nature* 332: 564–568.
6. Riegman PH, Klaassen P, van der Korput JA, Romijn JC, Trapman J (1988) Molecular cloning and characterization of novel prostate antigen cDNAs. *Biochem Biophys Res Commun* 155: 181–188.
7. Balk SP, Ko YJ, Bublej GJ (2003) Biology of prostate-specific antigen. *J Clin Oncol* 21: 383–391.
8. Lövgren J, Airas K, Lilja H (1999) Enzymatic action of human glandular kallikrein 2 (hK2): Substrate specificity and regulation by Zn<sup>2+</sup> and extracellular protease inhibitors. *Eur J Biochem* 262: 781–789.
9. Sensabaugh GF (1978) Isolation and characterization of a semen-specific protein from human seminal plasma: A potential new marker for semen identification. *J Forensic Sci* 23: 106–115.
10. Lundwall A, Bjartell A, Olsson AY, Malm J (2002) Semenogelin I and II, the predominant human seminal plasma proteins, are also expressed in non-genital tissues. *Mol Hum Reprod* 8: 805–810.
11. Lilja H, Oldbring J, Rannevik G, Laurell CB (1987) Seminal vesicle-secreted proteins and their reactions during gelation and liquefaction of human semen. *J Clin Invest* 80: 281–285.
12. Dorus S, Evans PD, Wyckoff GJ, Choi SS, Lahn BT (2004) Rate of molecular evolution of the seminal protein gene *SEMG2* correlates with levels of female promiscuity. *Nat Genet* 36: 1326–1329.
13. Tauber PF, Propping D, Schumacher GFB, Zaneveld LJD (1980) Biochemical aspects of the coagulation and liquefaction of human semen. *J Androl* 1: 280–288.
14. Lilja H (1985) A kallikrein-like serine protease in prostatic fluid cleaves the predominant seminal vesicle protein. *J Clin Invest* 76: 1899–1903.
15. Wang ET, Sandberg R, Luo S, Khrebtkova I, Zhang L, et al. (2008) Alternative isoform regulation in human tissue transcriptomes. *Nature* 456: 470–476.
16. Keren H, Lev-Maor G, Ast G (2010) Alternative splicing and evolution: Diversification, exon definition, and function. *Nat Rev Genet* 11: 345–355.
17. Heuzé-Vourc'h N, Leblond V, Courty Y (2003) Complex alternative splicing of the *hKLK3* gene coding for the tumor marker PSA (prostate-specific-antigen). *Eur J Biochem* 270: 706–714.
18. Haerty W, Jagadeeshan S, Kulathinal RJ, Wong A, Ravi Ram K, et al. (2007) Evolution in the fast lane: Rapidly evolving sex-related genes in *Drosophila*. *Genetics* 177: 1321–1335.
19. Pujolar JM, Pogson GH (2011) Positive Darwinian selection in gamete recognition proteins of *Strongylocentrotus* sea urchins. *Mol Ecol* 20: 4968–4982.
20. Marques PI, Bernardino R, Fernandes T, NISC Comparative Sequencing Program, Green ED, et al. (2012) Birth and death of *KLK3* and *KLK2* in primates: Evolution driven by reproductive biology. *Genome Biol Evol* 4: 1331–1338.
21. Clark NL, Swanson WJ (2005) Pervasive adaptive evolution in primate seminal proteins. *PLoS Genet* 1:e35.
22. Mubiru JN, Hubbard GB, Dick EJ Jr, Furman J, Troyer DA, et al. (2008) Nonhuman primates as models for studies of prostate specific antigen and prostatic diseases. *Prostate* 68: 1546–1554.
23. Mubiru JN, Shen-Ong GL, Valente AJ, Troyer DA (2004) Alternative spliced variants of the alpha-methylacyl-CoA racemase gene and their expression in prostate cancer. *Gene* 327: 89–98.
24. Marshall DJ, Rudnick KA, Lu J, Snyder LA (2006) Cloning and sequencing of the cynomolgus monkey prostate specific antigen cDNA. *J Med Primatol* 35: 12–17.
25. Heuzé-Vourc'h N, Leblond V, Olayat S, Gauthier F, Courty Y (2001) Characterization of PSA-RP2, a protein related to prostate-specific antigen and encoded by alternative *hKLK3* transcripts. *Eur J Biochem* 268: 4408–4413.
26. Edgar RC (2004) MUSCLE: Multiple sequence alignment with high accuracy and high throughput. *Nucleic Acids Res* 32: 1792–1797.
27. Steinway SN, Dannenfeller R, Laucius CD, Hayes JE, Nayak S (2010) JCoDA: A tool for detecting evolutionary selection. *BMC Bioinformatics* 11: 284.
28. Yang Z (2007) PAML 4: Phylogenetic analysis by maximum likelihood. *Mol Biol Evol* 8: 1586–1591.
29. Goldman N, Yang Z (1994) A codon-based model of nucleotide substitution for protein-coding DNA sequences. *Mol Biol Evol* 11: 725–736.
30. Yang Z, Bielawski JP (2000) Statistical methods for detecting molecular adaptation. *Tr Ecol Evol* 15: 496–503.
31. Yang Z, Wong WS, Nielsen R (2005) Bayes empirical Bayes inference of amino acid sites under positive selection. *Mol Biol Evol* 22: 1107–1118.
32. Felsenstein J (1981) Evolutionary trees from DNA sequences: A maximum likelihood approach. *J Mol Evol* 17: 368–376.
33. Debela M, Magdolen V, Schechter N, Valachova M, Lottspeich F, et al. (2006) Specificity profiling of seven human tissue kallikreins reveals individual subsite preferences. *J Biol Chem* 281: 25,678–25,688.
34. Kurlender L, Borgono C, Michael IP, Obiezu C, Elliott MB, et al. (2005) A survey of alternative transcripts of human tissue kallikrein genes. *Biochim Biophys Acta* 25: 1–14.
35. Whitbread AK, Veveris-Lowe TL, Dong Y, Tan OL, Gardiner R, et al. (2010) Expression of *PSA-RP2*, an alternatively spliced variant from the *PSA* gene, is increased in prostate cancer tissues but the protein is not secreted from prostate cancer cells. *Biol Chem* 391: 461–466.
36. Steiner MS, Couch RC, Raghov S, Stauffer D (1999) The chimpanzee as a model of human benign prostatic hyperplasia. *J Urol* 162: 1454–1461.
37. Scally A, Dutheil JY, Hillier LW, Jordan GE, Goodhead I, et al. (2012). Insights into hominid evolution from the gorilla genome sequence. *Nature* 483: 169–175.
38. Dixon AF (2012) Primate sexuality: Comparative studies of the prosimians, monkeys, apes, and humans. New York: Oxford University Press.
39. Goodall J. (1986) The chimpanzees of Gombe: Patterns of behavior. Cambridge, MA: Belknap Press, Harvard University Press.
40. Dixon AF, Anderson MJ (2002) Sexual selection, seminal coagulation, and copulatory plug formation in primates. *Folia Primatol (Basel)* 73: 63–69.
41. Thompson JD, Higgins DG, Gibson TJ (1994) CLUSTALW: Improving the sensitivity of progressive multiple sequence alignment through sequence weighting, position-specific gap penalties and weight matrix choice. *Nucleic Acids Res* 11: 4673–4680.

## Author Contributions

Conceived and designed the experiments: JNM JR RES EJD MO. Performed the experiments: JNM ASY CBL MGF MO EJD. Analyzed the data: JNM CO CBL JR RES SN. Contributed reagents/materials/analysis tools: CO CBL JR RES SN. Wrote the paper: JNM JR CO SN. Obtained the software to run analysis: SN CBL CO.
